# Supplementary material for: Efficient Antibacterial/Antifungal Activities: Synthesis, Molecular Docking, Molecular Dynamics, Pharmacokinetic, and Binding Free Energy of Galactopyranoside Derivatives
Source: MDPI journal article supplement (doi:10.3390/molecules28010219), 2022-12-26
Supplement: s1 [file s1]

*Supplementary Materials*

# Efficient Antibacterial/Antifungal Activities: Synthesis, Molecular Docking, Molecular Dynamics, Pharmacokinetic, and Binding Free Energy of Galactopyranoside Derivatives

Faez Ahmmed <sup>1</sup>, Anis Ul Islam <sup>1</sup>, Yousef E. Mukhrish <sup>2</sup>, Youness El Bakri <sup>3</sup>, Sajjad Ahmad <sup>4</sup>, Yasuhiro Ozeki <sup>5</sup> and Sarkar M. A. Kawsar <sup>1,\*</sup>

<sup>1</sup> Laboratory of Carbohydrate and Nucleoside Chemistry (LCNC), Department of Chemistry, Faculty of Science, University of Chittagong, Chittagong-4331, Bangladesh

<sup>2</sup> Department of Chemistry, Faculty of Science, Jazan University, Jazan 45142, Saudi Arabia

<sup>3</sup> Department of Theoretical and Applied Chemistry, South Ural State University, Lenin prospect 76, Chelyabinsk, 454080, Russian Federation

<sup>4</sup> Department of Health and Biological Sciences, Abasyn University, Peshawar 25000, Pakistan

<sup>5</sup> School of Sciences, Yokohama City University, 22-2, Seto, Kanazawa-ku, Yokohama 236-0027, Japan

\* Correspondence: Correspondence: akawsarabe@yahoo.com; Tel.: +88 0176 2717081

**Citation:** Ahmmed, F.; Islam, A.U.; Mukhrish, Y.E.; El Bakri, Y.; Ahmad, S.; Ozeki, Y.; Kawsar, S.M.A. Efficient Antibacterial/Antifungal Activities: Synthesis, Molecular Docking, Molecular Dynamics, Pharmacokinetic, and Binding Free Energy of Galactopyranoside Derivatives. *Molecules* **2023**, *28*, 219. <https://doi.org/10.3390/molecules28010219>

Academic Editor: Andreas Tzakos

Received: 3 October 2022

Revised: 13 December 2022

Accepted: 23 December 2022

Published: 26 December 2022

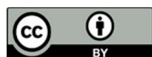

**Copyright:** © 2022 by the authors. Submitted for possible open access publication under the terms and conditions of the Creative Commons Attribution (CC BY) license (<https://creativecommons.org/licenses/by/4.0/>).

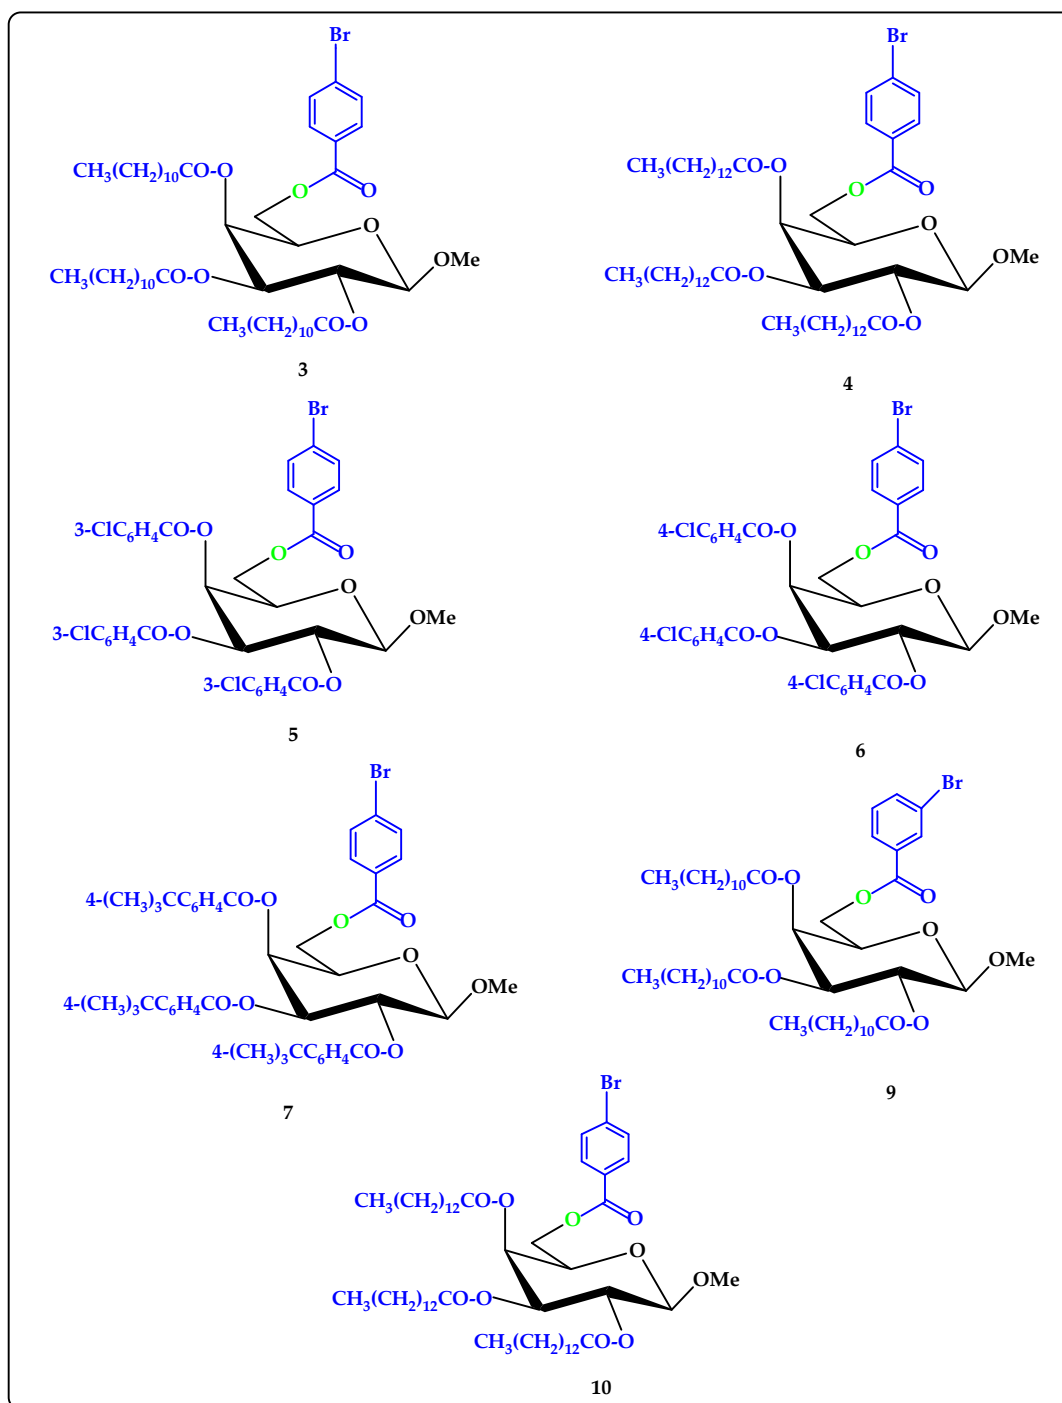

**Figure S1.** Chemical structures of the synthesized  $\beta$ -MGP derivatives (3-10).

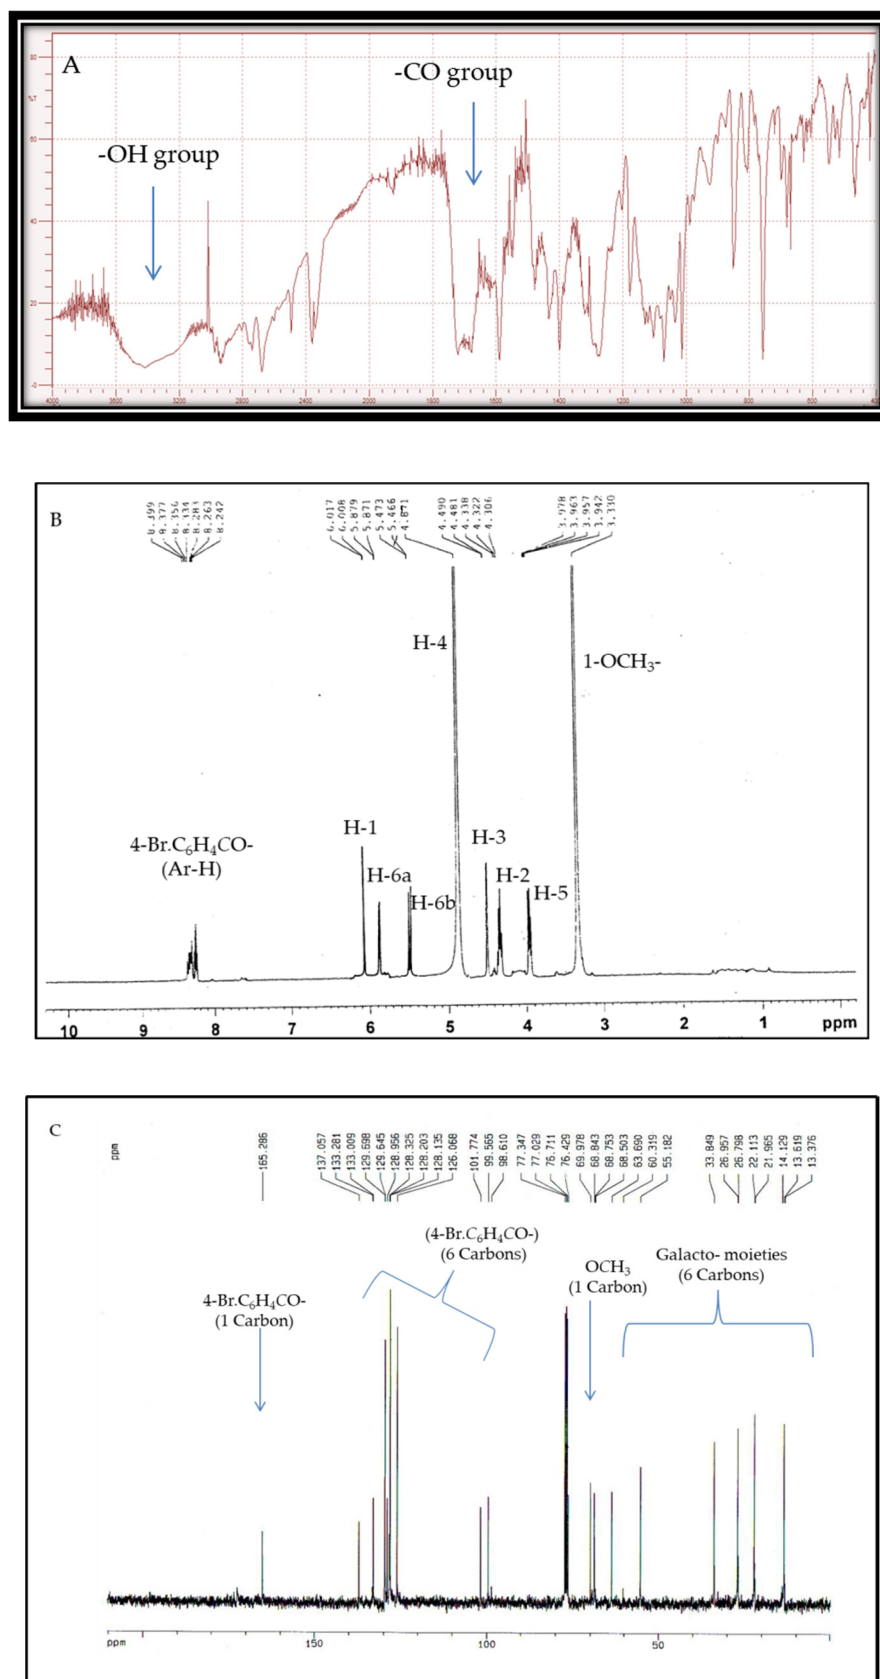

Figure S2. (A) FTIR (B) <sup>1</sup>H-NMR and (C) <sup>13</sup>C-NMR spectra of the compound 2.

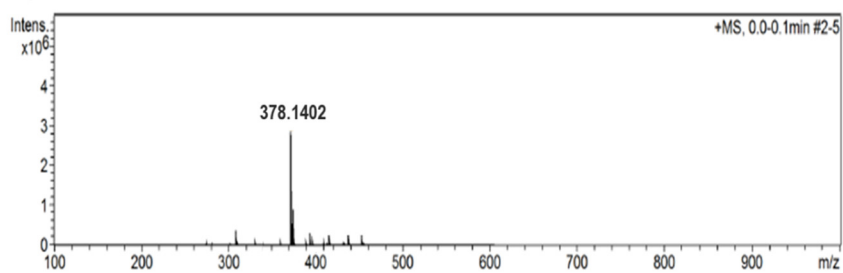

Figure S3. MS spectra of the compound 2.

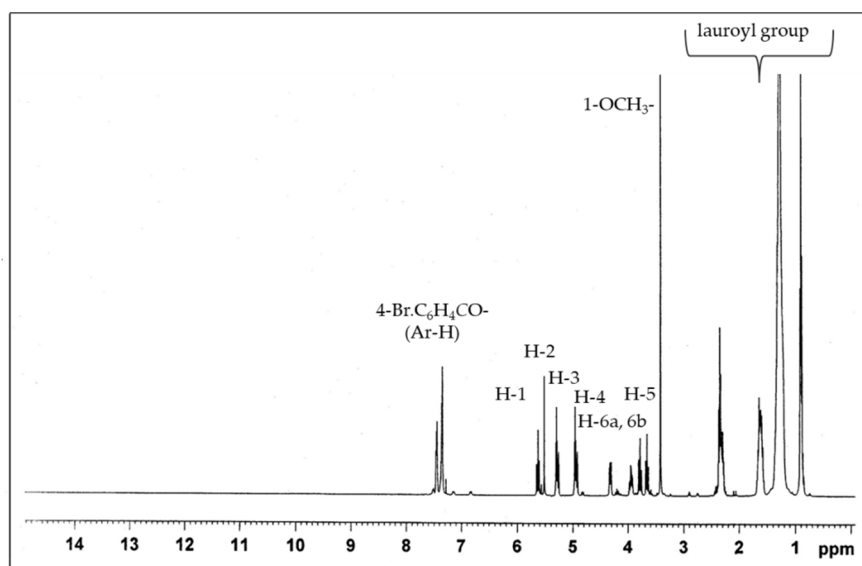

Figure S4. <sup>1</sup>H-NMR spectra of the compound 3.

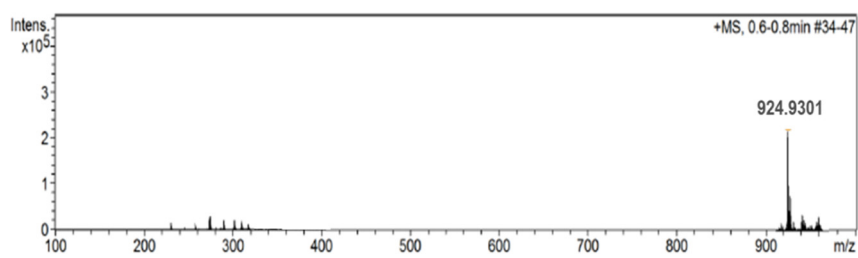

Figure S5. MS spectra of the compound 3.

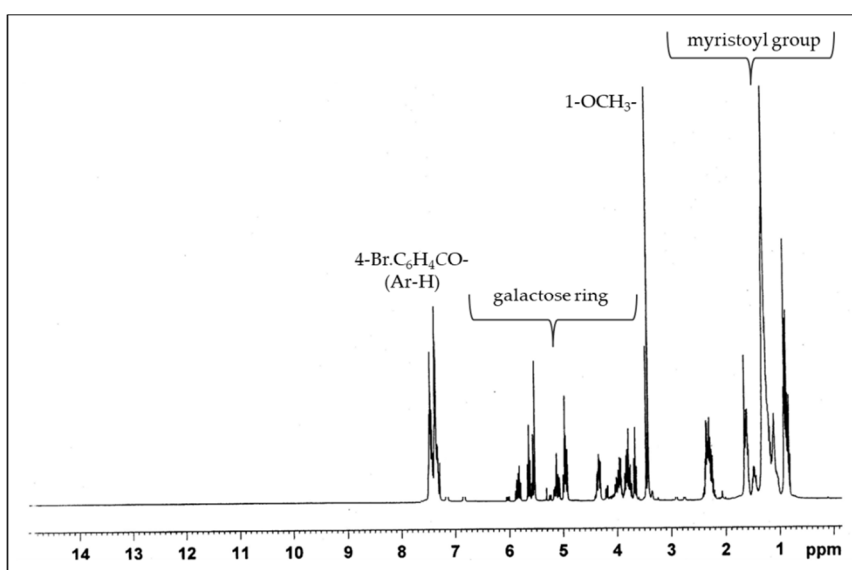

Figure S6.  $^1\text{H-NMR}$  spectra of the compound 4.

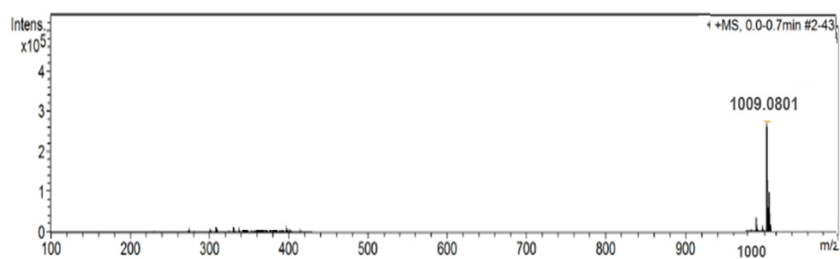

Figure S7. MS spectra of the compound 4.

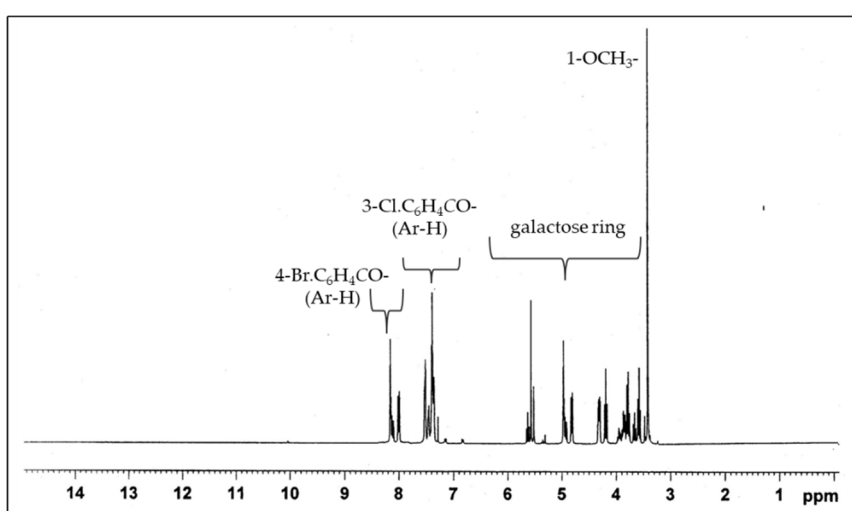

Figure S8.  $^1\text{H-NMR}$  spectra of the compound 5.

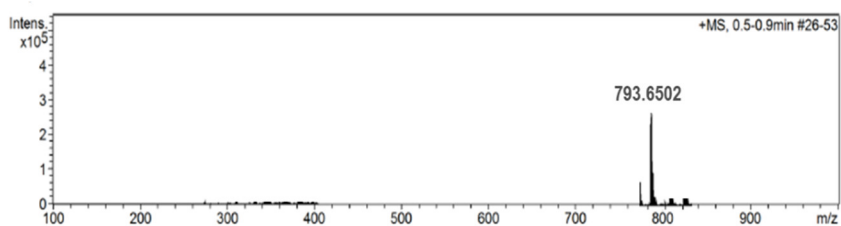

Figure S9. MS spectra of the compound 5.

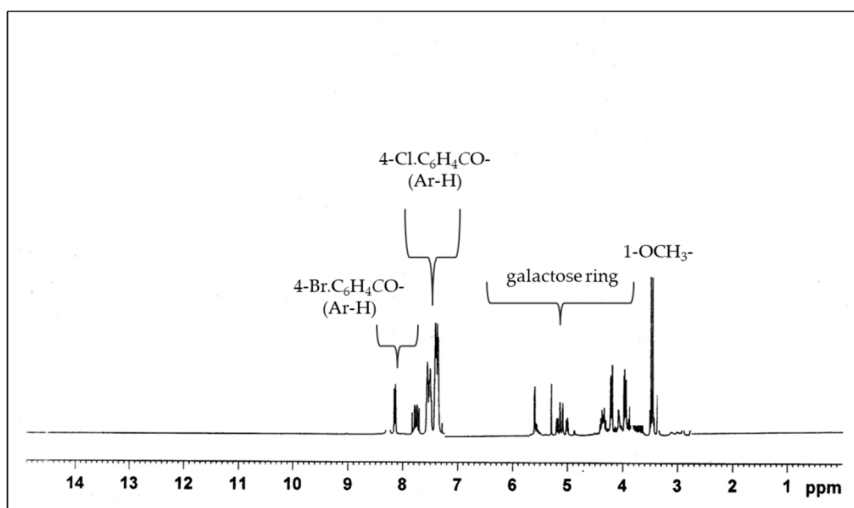Figure S10. <sup>1</sup>H-NMR spectra of the compound 6.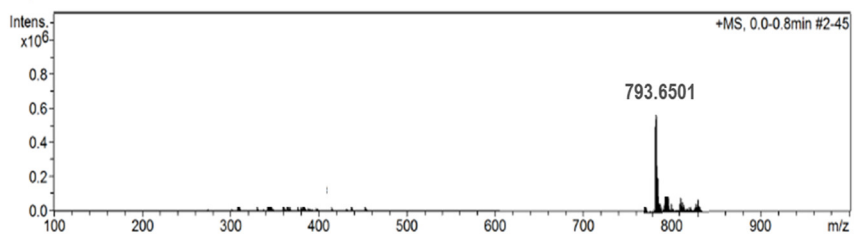

Figure S11. MS spectra of the compound 6.

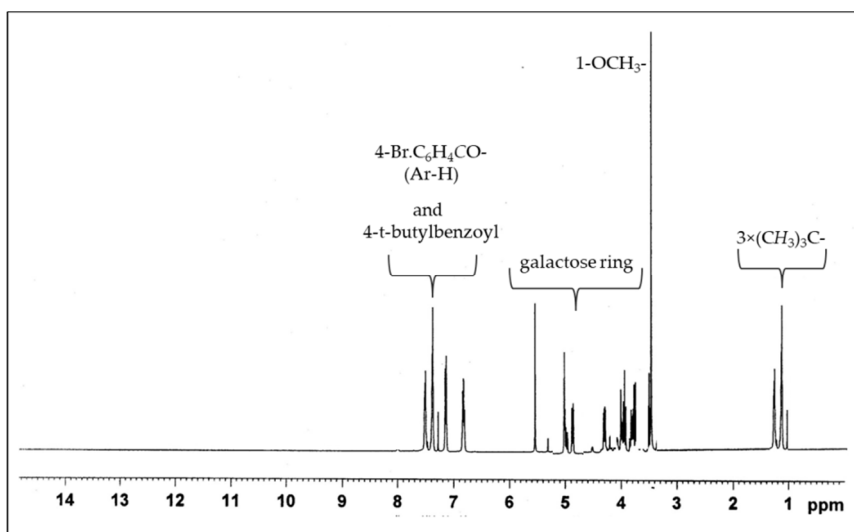Figure S12. <sup>1</sup>H-NMR spectra of the compound 7.

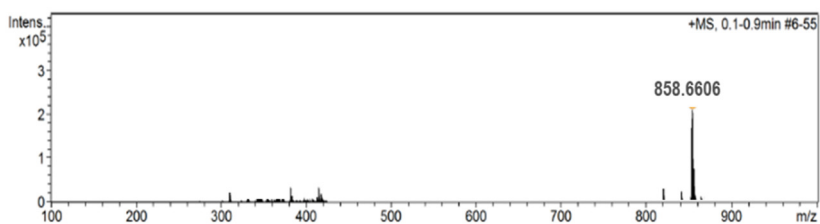

Figure S13. MS spectra of the compound 7.

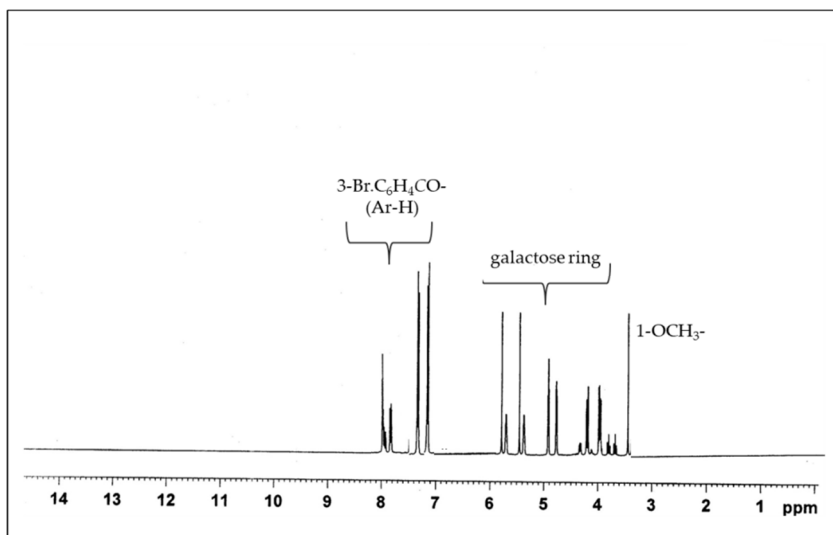

Figure S14.  $^1\text{H}$ -NMR spectra of the compound 8.

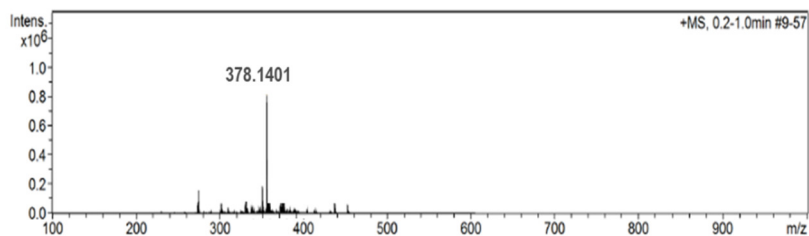

Figure S15. MS spectra of the compound 8.

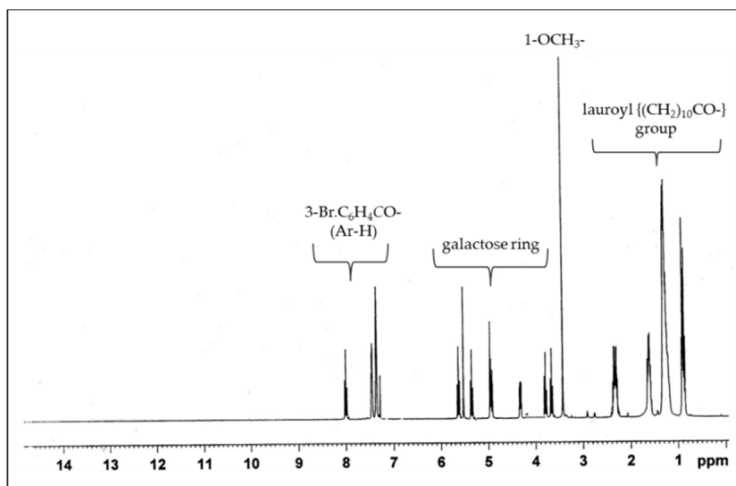

Figure S16.  $^1\text{H}$ -NMR spectra of the compound 9.

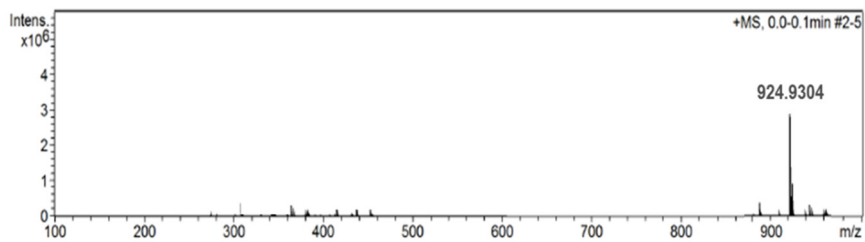

Figure S17. MS spectra of the compound 9.

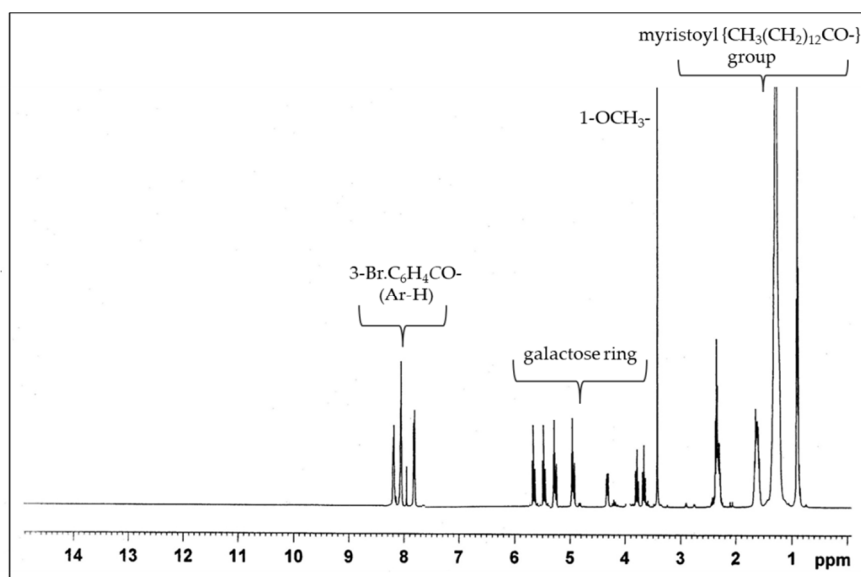

Figure S18.  $^1\text{H}$ -NMR spectra of the compound 10.

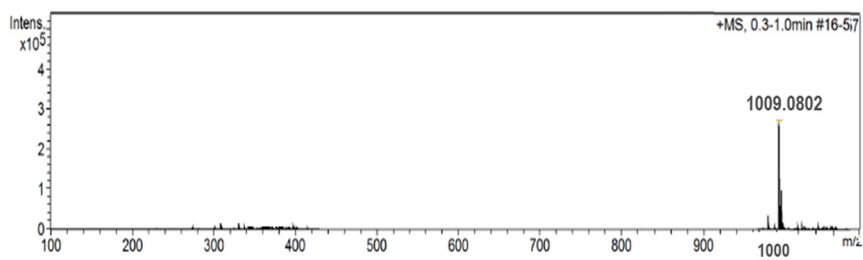

Figure S19. MS spectra of the compound 10.

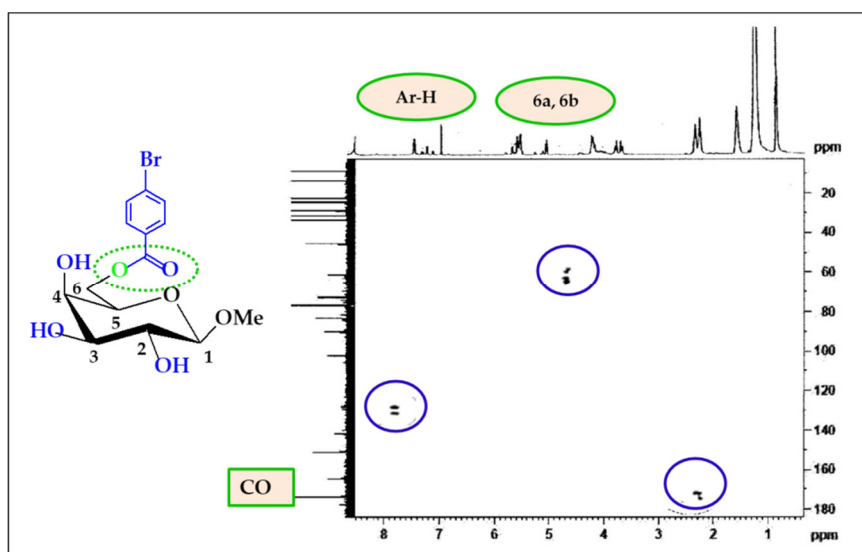

Figure S20. HMBC correlations of derivative 2; CO with Ar-H, H-6b, and H-6b protons.

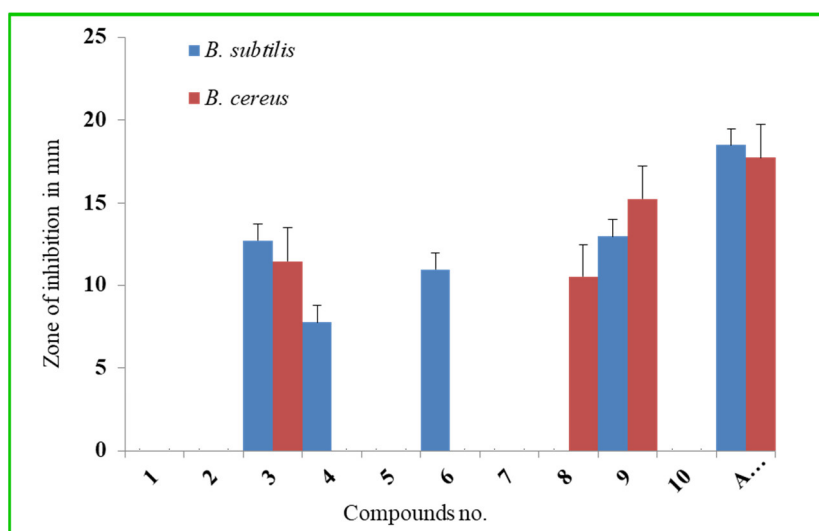

Figure S21. Zone of inhibition observed against Gram-positive bacteria by derivatives 2-10.

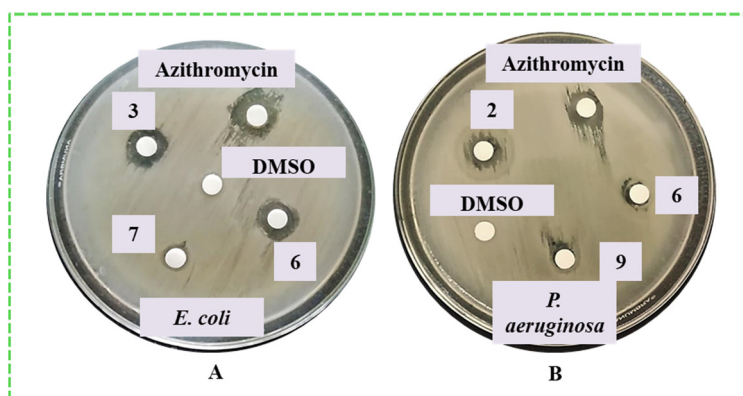

Figure S22. Experimental dishes of the synthesized derivatives 2, 3, 6, 7 and 9 against (A); *E. coli* and (B); *P. aeruginosa*, Here DMSO = Negative control and Azithromycin = Positive control.

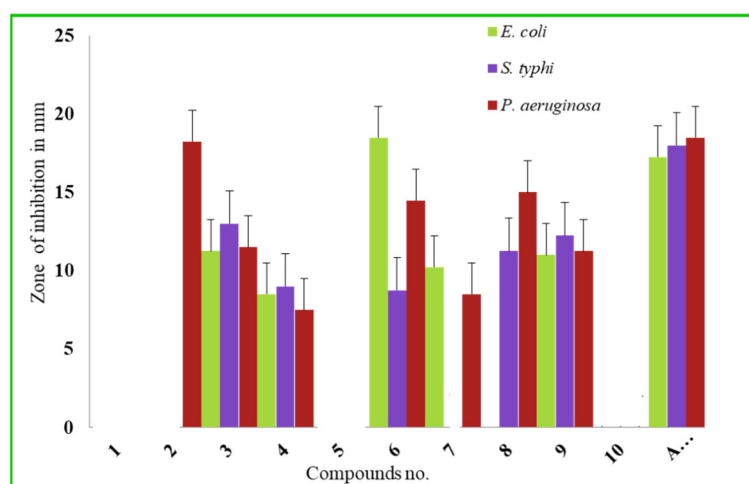

Figure S23. Zone of inhibition observed against Gram-negative bacteria by derivatives 2-10.

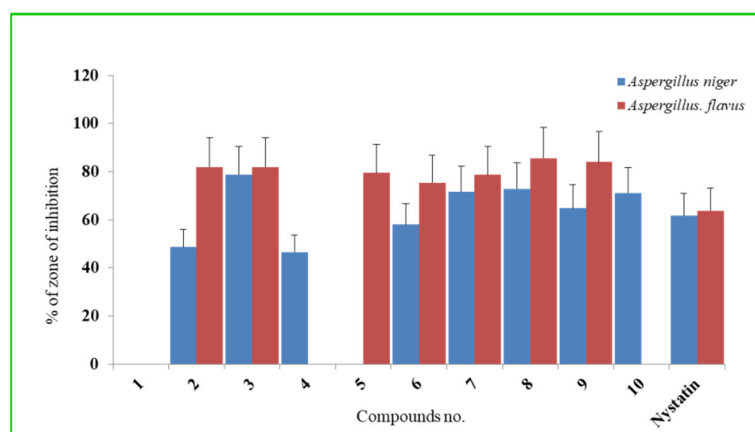

Figure S24. Antifungal activities of the synthesized derivatives 2-10.

**Table S1.**  $^1\text{H}$  NMR and  $^{13}\text{C}$  NMR shift values of compound (**2**).  $^1\text{H}$  and  $^{13}\text{C}$  assignments were obtained from HSQC and HMBC experiments.

| Position                               | $\delta_{\text{H}}$ (ppm) (J Hz) | (HSQC)<br>$\delta_{\text{C}}$ (ppm) | HMBC                   |
|----------------------------------------|----------------------------------|-------------------------------------|------------------------|
| Ar-H                                   | 7.90 (m)                         | 135.22                              | H: Ar                  |
| Ar-H                                   | 7.58 (m)                         | 130.80                              | H: Ar                  |
| H-1                                    | 5.01 (d, J = 8.1)                | 101.05                              | H: 2, OCH <sub>3</sub> |
| H-6a                                   | 4.85 (dd, J = 11.0 and 6.3)      | 63.31                               | H: 5, CO               |
| H-6b                                   | 4.63 (dd, J = 11.0 and 6.2)      | 64.65                               | H: 5, CO               |
| H-4                                    | 4.21 (d, J = 3.7)                | 76.64                               | H: 3, 5                |
| H-3                                    | 4.01 (dd, J = 3.2 and 10.4)      | 75.08                               | H: 2, 4                |
| H-2                                    | 3.92 (dd, J = 8.0 and 10.1)      | 68.32                               | H: 1, 3                |
| H-5                                    | 3.61 (m)                         | 58.12                               | H: 4, 6a, 6b           |
| 1-OCH <sub>3</sub>                     | 3.16 (s)                         | 57.16                               | H: 1                   |
| 4-Br.C <sub>6</sub> H <sub>4</sub> CO- |                                  | 178.44                              | H: 6a, 6b              |

**Table S2.** The MIC and MBC values in mg/L of analogs **2** and **3** against tested organisms.

| Name of bacteria     | MIC (mg/L) |            | MBC (mg/L) |            |
|----------------------|------------|------------|------------|------------|
|                      | Compound 3 | Compound 9 | Compound 3 | Compound 9 |
| <i>B. subtilis</i>   | 0.125      | 1.00       | 8.00       | 16.00      |
| <i>B. cereus</i>     | 2.00       | 0.50       | 16.00      | 8.00       |
| <i>E. coli</i>       | 8.00       | 8.00       | 16.00      | 8.00       |
| <i>S. typhi</i>      | 0.25       | 1.00       | 8.00       | 16.00      |
| <i>P. aeruginosa</i> | 2.00       | 2.00       | 8.00       | 16.00      |

**Table S3.** Molecular formula, molecular weight, electronic energy ( $E$ ), enthalpy ( $H$ ), Gibb's free energy ( $G$ ) in Hartree and dipole moment ( $p$ , Debye) of  $\beta$ -MGP derivatives.

| Entry | MF                                                                | MW      | $E$       | $H$       | $G$       | $p$   |
|-------|-------------------------------------------------------------------|---------|-----------|-----------|-----------|-------|
| 1     | C <sub>7</sub> H <sub>14</sub> O <sub>6</sub>                     | 194.18  | -722.2093 | -722.2084 | -722.2608 | 4.771 |
| 2     | C <sub>14</sub> H <sub>17</sub> O <sub>7</sub> Br                 | 377.18  | -3625.756 | -3625.755 | -3625.837 | 5.569 |
| 3     | C <sub>50</sub> H <sub>83</sub> O <sub>10</sub> Br                | 924.09  | -5253.322 | -5253.321 | -5253.520 | 4.263 |
| 4     | C <sub>56</sub> H <sub>95</sub> O <sub>10</sub> Br                | 1008.25 | -5487.767 | -5487.766 | -5487.984 | 3.321 |
| 5     | C <sub>35</sub> H <sub>26</sub> O <sub>10</sub> BrCl <sub>3</sub> | 792.84  | -6025.313 | -6025.312 | -6025.446 | 7.450 |
| 6     | C <sub>35</sub> H <sub>26</sub> O <sub>10</sub> BrCl <sub>3</sub> | 792.84  | -6025.325 | -6025.324 | -6025.445 | 8.574 |
| 7     | C <sub>47</sub> H <sub>53</sub> O <sub>10</sub> Br                | 857.82  | -5121.980 | -5121.979 | -5121.138 | 7.120 |
| 8     | C <sub>14</sub> H <sub>17</sub> O <sub>7</sub> Br                 | 377.14  | -3625.365 | -3625.364 | -3625.698 | 5.357 |
| 9     | C <sub>50</sub> H <sub>83</sub> O <sub>10</sub> Br                | 923.93  | -5253.192 | -5253.191 | -5253.456 | 4.478 |
| 10    | C <sub>56</sub> H <sub>95</sub> O <sub>10</sub> Br                | 1008.08 | -5487.547 | -5487.546 | -5487.883 | 4.190 |

**Table S4.** Prediction of *in silico* of metabolism of  $\beta$ -MGP analogs.

| Drugs | Cyp1A2 | Cyp2C19 | Cyp2D6 | Cyp3A4 |
|-------|--------|---------|--------|--------|
| 1     | No     | No      | No     | No     |
| 2     | No     | No      | No     | No     |
| 3     | No     | No      | No     | Yes    |
| 4     | No     | No      | No     | No     |
| 5     | No     | No      | No     | No     |
| 6     | No     | No      | No     | No     |
| 7     | No     | No      | No     | No     |
| 8     | No     | No      | No     | No     |
| 9     | No     | No      | No     | Yes    |
| 10    | No     | No      | No     | No     |

**Table S5.** Prediction *in silico* of the toxicity of  $\beta$ -MGP analogs.

| Entry | Ames toxicity | T.Pyiformis<br>Toxicity | Herg1<br>inhibition | LD50  | Skin<br>sensitisation |
|-------|---------------|-------------------------|---------------------|-------|-----------------------|
| 1     | No            | 0.184                   | No                  | 2.533 | No                    |
| 2     | No            | 0.178                   | No                  | 1.074 | No                    |
| 3     | No            | 0.252                   | No                  | 2.620 | No                    |
| 4     | No            | 0.336                   | No                  | 2.457 | No                    |
| 5     | No            | 0.488                   | No                  | 2.606 | No                    |
| 6     | No            | 0.173                   | No                  | 2.291 | No                    |
| 7     | No            | 0.202                   | No                  | 2.346 | No                    |
| 8     | No            | 0.294                   | No                  | 2.841 | No                    |
| 9     | No            | 0.431                   | No                  | 2.132 | No                    |
| 10    | No            | 0.363                   | No                  | 2.481 | No                    |

**Table S6.** Name of the pathogenic microorganisms.

| Types of organisms     | Strain                        | Reference   |
|------------------------|-------------------------------|-------------|
| Gram-positive bacteria | <i>Bacillus subtilis</i>      | ATCC 6633   |
|                        | <i>Bacillus cereus</i>        | BTCC 19     |
| Gram-negative bacteria | <i>Escherichia coli</i>       | ATCC 8739   |
|                        | <i>Salmonella typhi</i>       | AE 14612    |
|                        | <i>Pseudomonas aeruginosa</i> | ATCC 9027   |
| Name of the fungi      | <i>Aspergillus niger</i>      | ATCC 16404  |
|                        | <i>Aspergillus flavus</i>     | ATCC 204304 |

### Synthesis

Methyl 6-O-(4-bromobenzoyl)- $\beta$ -D-galactopyranoside (**2**): Yield %79.55; m.p. 67–68 °C; IR (KBr):  $\nu/\text{cm}^{-1}$  1716 (C=O), 3392–3497 (br) (-OH);  $^1\text{H-NMR}$  (400 MHz,  $\text{CDCl}_3$ ):  $\delta_{\text{H}}$  8.37 (2H, m, Ar-H), 8.26 (2H, m, Ar-H), 6.01 (1H, d,  $J$  = 8.0 Hz, H-1), 5.87 (1H, dd,  $J$  = 11.0 and 6.1 Hz, H-6a), 5.46 (1H, dd,  $J$  = 11.1 and 6.2 Hz, H-6b), 4.87 (1H, d,  $J$  = 3.6 Hz, H-4),

4.48 (1H, dd,  $J = 3.0$  and  $10.2$  Hz, H-3), 4.32 (1H, dd,  $J = 8.1$  and  $10.0$  Hz, H-2), 3.96 (1H, m, H-5), **3.33** (3H, s, 1-OCH<sub>3</sub>); MS [ $m/z$ ]: 378.1402; Calcd. For C<sub>14</sub>H<sub>23</sub>O<sub>7</sub>Br: C, 44.55%, H, 4.54%; Found: C, 44.56%, H, 4.56%.

*General procedure for the preparation of lauroy derivatives 3-7*

Methyl 6-O-(4-bromobenzoyl)-2,3,4-tri-O-lauroyl- $\beta$ -D-galactopyranoside (**3**): Yield %73.71; m.p. 52–53 °C; IR (KBr):  $\nu/\text{cm}^{-1}$  1701 (C=O); <sup>1</sup>H-NMR (400 MHz, CDCl<sub>3</sub>):  $\delta_{\text{H}}$  7.45 (2H, m, Ar-H), 7.36 (2H, m, Ar-H), 5.63 (1H, d,  $J = 8.0$  Hz, H-1), 5.61 (1H, dd,  $J = 8.0$  and  $10.2$  Hz, H-2), 5.58 (1H, dd,  $J = 3.1$  and  $10.5$  Hz, H-3), 4.97 (1H, d,  $J = 3.5$  Hz, H-4), 4.33 (1H, dd,  $J = 11.1$  and  $6.2$  Hz, H-6a), 3.79 (1H, dd,  $J = 11.1$  and  $6.3$  Hz, H-6b), 3.66 (1H, m, H-5), 3.42 (3H, s, 1-OCH<sub>3</sub>), 2.33 {6H, m, 3×CH<sub>3</sub>(CH<sub>2</sub>)<sub>9</sub>CH<sub>2</sub>CO-}, 1.63 {6H, m, 3×CH<sub>3</sub>(CH<sub>2</sub>)<sub>8</sub>CH<sub>2</sub>CH<sub>2</sub>CO-}, 1.28 {48H, m, 3×CH<sub>3</sub>(CH<sub>2</sub>)<sub>8</sub>CH<sub>2</sub>CH<sub>2</sub>CO-}, 0.88 {9H, m, 3×CH<sub>3</sub>(CH<sub>2</sub>)<sub>10</sub>CO-}; MS [ $m/z$ ]: 924.9301; Calcd. For C<sub>50</sub>H<sub>83</sub>O<sub>10</sub>Br: C, 64.94%, H, 9.05%; Found: C, 64.96%, H, 9.06%.

Methyl 6-O-(4-bromobenzoyl)-2,3,4-tri-O-myristoyl- $\beta$ -D-galactopyranoside (**4**): Yield %75.89; Mp: 54–56 °C (EtOAc-*n*-C<sub>6</sub>H<sub>14</sub>,  $R_f = 0.53$ ); IR (KBr):  $\nu/\text{cm}^{-1}$  1706 (C=O); <sup>1</sup>H-NMR (400 MHz, CDCl<sub>3</sub>):  $\delta_{\text{H}}$  7.49 (2H, m, Ar-H), 7.40 (2H, m, Ar-H), 5.81 (1H, d,  $J = 8.1$  Hz, H-1), 5.66 (1H, dd,  $J = 8.1$  and  $10.2$  Hz, H-2), 5.63 (1H, dd,  $J = 3.1$  and  $10.2$  Hz, H-3), 5.54 (1H, d,  $J = 3.2$  Hz, H-4), 4.32 (1H, dd,  $J = 11.1$  and  $6.8$  Hz, H-6a), 3.96 (1H, dd,  $J = 11.0$  and  $6.3$  Hz, H-6b), 3.82 (1H, m, H-5), 3.42 (3H, s, 1-OCH<sub>3</sub>), 2.31 {6H, m, 3×CH<sub>3</sub>(CH<sub>2</sub>)<sub>11</sub>CH<sub>2</sub>CO-}, 1.60 {6H, m, 3×CH<sub>3</sub>(CH<sub>2</sub>)<sub>10</sub>CH<sub>2</sub>CH<sub>2</sub>CO-}, 1.25 {60H, m, 3×CH<sub>3</sub>(CH<sub>2</sub>)<sub>10</sub>CH<sub>2</sub>CH<sub>2</sub>CO-}, 0.87 {9H, m, 3×CH<sub>3</sub>(CH<sub>2</sub>)<sub>12</sub>CO-}; MS [ $m/z$ ]: 1009.0801; Calcd. For C<sub>56</sub>H<sub>95</sub>O<sub>10</sub>Br: C, 66.66%, H, 9.50%; Found: C, 66.68%, H, 9.52%.

Methyl 6-O-(4-bromobenzoyl)-2,3,4-tri-O-(3-chlorobenzoyl)- $\beta$ -D-galactopyranoside (**5**): Yield %74.02; m.p. 134–136 °C (EtOAc-*n*-C<sub>6</sub>H<sub>14</sub>,  $R_f = 0.53$ ); IR (KBr):  $\nu/\text{cm}^{-1}$  1692 (C=O); <sup>1</sup>H-NMR (400 MHz, CDCl<sub>3</sub>):  $\delta_{\text{H}}$  8.09 (3H, m, Ar-H), 8.01 (3H, m, Ar-H), 7.48 (2H, m, Ar-H), 7.44 (2H, m, Ar-H), 7.40 (3H, m, Ar-H), 7.35 (3H, m, Ar-H), 5.64 (1H, m, br, H-1), 5.52 (1H, dd,  $J = 8.1$  and  $10.3$  Hz, H-2), 4.94 (1H, dd,  $J = 3.0$  and  $10.2$  Hz, H-3), 4.80 (1H, d,  $J = 3.5$  Hz, H-4), 4.21 (1H, dd,  $J = 11.1$  and  $6.3$  Hz, H-6a), 3.84 (1H, dd,  $J = 11.0$  and  $6.1$  Hz, H-6b), 3.58 (1H, m, H-5), 3.42 (3H, s, 1-OCH<sub>3</sub>); MS [ $m/z$ ]: 793.6502; Calcd. For C<sub>35</sub>H<sub>26</sub>O<sub>10</sub>Br.3Cl: C, 52.99%, H, 3.31%; Found: C, 53.01%, H, 3.3%.

Methyl 6-O-(4-bromobenzoyl)-2,3,4-tri-O-(4-chlorobenzoyl)- $\beta$ -D-galactopyranoside (**6**): Yield %57.85; m.p. 160–161 °C (EtOAc-*n*-C<sub>6</sub>H<sub>14</sub>,  $R_f = 0.56$ ); IR (KBr):  $\nu/\text{cm}^{-1}$  1711 (C=O); <sup>1</sup>H-NMR (400 MHz, CDCl<sub>3</sub>):  $\delta_{\text{H}}$  8.10 (6H, m, Ar-H), 7.88 (2H, m, Ar-H), 7.52 (6H, m, Ar-H), 7.42 (2H, m, Ar-H), 5.65 (1H, d,  $J = 3.2$  Hz, H-1), 5.23 (1H, dd,  $J = 3.4$  and  $10.0$  Hz, H-2), 5.10 (1H, m, H-3), 4.97 (1H, t,  $J = 9.1$  Hz, H-4), 4.14 (1H, m, H-6a), 4.01 (1H, t,  $J = 10.2$  Hz, H-6b), 3.98 (1H, m, H-5), 3.41 (3H, s, 1-OCH<sub>3</sub>); MS [ $m/z$ ]: 793.6501; Calcd. For C<sub>35</sub>H<sub>26</sub>O<sub>10</sub>Br.3Cl: C, 52.99%, H, 3.31%; Found: C, 52.97%, H, 3.30%.

Methyl 6-*O*-(4-bromobenzoyl)-2,3,4-tri-*O*-(4-*t*-butylbenzoyl)- $\beta$ -D-galactopyranoside (7): Yield %45.51; m.p. 106–107 °C (EtOAc-*n*-C<sub>6</sub>H<sub>14</sub>, *R<sub>f</sub>* = 0.54); IR (KBr):  $\nu$ /cm<sup>−1</sup> 1716 (C=O); <sup>1</sup>H-NMR (400 MHz, CDCl<sub>3</sub>) (ppm):  $\delta$ <sub>H</sub> 7.51 (2H, m, Ar-H), 7.38 (6H, m, 3×Ar-H), 7.15 (2H, m, Ar-H), 6.91 (6H, m, 3×Ar-H), 5.52 (1H, d, *J* = 8.1 Hz, H-1), 5.02 (1H, dd, *J* = 8.1 and 10.2 Hz, H-2), 4.89 (1H, dd, *J* = 3.2 and 10.2 Hz, H-3), 4.58 (1H, d, *J* = 3.3 Hz, H-4), 4.01 (1H, dd, *J* = 11.0 and 6.3 Hz, H-6a), 3.86 (1H, dd, *J* = 11.0 and 6.3 Hz, H-6b), 3.78 (1H, m, H-5), 3.42 (3H, s, 1-OCH<sub>3</sub>), 1.07, 1.10, 1.18 [27H, 3×s, 3×(CH<sub>3</sub>)<sub>3</sub>C-]; MS [*m/z*]: 858.6606; Calcd. For C<sub>47</sub>H<sub>53</sub>O<sub>10</sub>Br: C, 65.76%, H, 6.23%; Found: C, 65.77%, H, 6.24%.

Methyl 6-*O*-(3-bromobenzoyl)- $\beta$ -D-galactopyranoside (8): Yield %48.25; m.p. 108–109 °C (EtOAc-*n*-C<sub>6</sub>H<sub>14</sub>, *R<sub>f</sub>* = 0.50); IR (KBr):  $\nu$ /cm<sup>−1</sup> 1720 (C=O), 3401–3496 (br) (−OH); <sup>1</sup>H-NMR (400 MHz, CDCl<sub>3</sub>):  $\delta$ <sub>H</sub> 8.01 (1H, d, *J* = 7.1 Hz, Ar-H), 7.95 (1H, s, Ar-H), 7.22 (1H, d, *J* = 7.2 Hz, Ar-H), 7.13 (1H, t, *J* = 7.4 Hz, Ar -H), 5.86 (1H, d, *J* = 8.0 Hz, H-1), 5.55 (1H, dd, *J* = 11.1 and 6.5 Hz, H-6a), 4.98 (1H, dd, *J* = 11.1 and 6.7 Hz, H-6b), 4.88 (1H, d, *J* = 3.5 Hz, H-4), 4.21 (1H, dd, *J* = 3.0 and 10.5 Hz, H-3), 3.99 (1H, dd, *J* = 8.0 and 10.5 Hz, H-2), 3.86 (1H, m, H-5), 3.41 (3H, s, 1-OCH<sub>3</sub>); MS [*m/z*]: 378.1401; Calcd. For C<sub>14</sub>H<sub>17</sub>O<sub>7</sub>Br: C, 44.55%, H, 4.54%; Found: C, 44.56%, H, 4.56%.

Methyl 6-*O*-(3-bromobenzoyl)-2,3,4-tri-*O*-lauroyl- $\beta$ -D-galactopyranoside (9): Yield %68.09; m.p. 114–115 °C (EtOAc-*n*-C<sub>6</sub>H<sub>14</sub>, *R<sub>f</sub>* = 0.53); IR (KBr):  $\nu$ /cm<sup>−1</sup> 1719 (C=O); <sup>1</sup>H-NMR (400 MHz, CDCl<sub>3</sub>) (ppm):  $\delta$ <sub>H</sub> 8.01 (1H, d, *J* = 7.3 Hz, Ar-H), 7.47 (1H, s, Ar-H), 7.36 (1H, d, *J* = 7.3 Hz, Ar-H), 7.16 (1H, t, *J* = 7.3 Hz, Ar -H), 5.63 (1H, d, *J* = 8.3 Hz, H-1), 5.52 (1H, dd, *J* = 8.0 and 10.2 Hz, H-2), 5.49 (1H, dd, *J* = 3.1 and 10.1 Hz, H-3), 4.97 (1H, d, *J* = 3.1 Hz, H-4), 4.33 (1H, dd, *J* = 11.0 and 6.0 Hz, H-6a), 3.78 (1H, dd, *J* = 11.1 and 6.4 Hz, H-6b), 3.66 (1H, m, H-5), 3.42 (3H, s, 1-OCH<sub>3</sub>), 2.32 {6H, m, 3×CH<sub>3</sub>(CH<sub>2</sub>)<sub>9</sub>CH<sub>2</sub>CO-}, 1.62 {6H, m, 3×CH<sub>3</sub>(CH<sub>2</sub>)<sub>8</sub>CH<sub>2</sub>CH<sub>2</sub>CO-}, 1.25 {48H, m, 3×CH<sub>3</sub>(CH<sub>2</sub>)<sub>8</sub>CH<sub>2</sub>CH<sub>2</sub>CO-}, 0.89 {9H, m, 3×CH<sub>3</sub>(CH<sub>2</sub>)<sub>10</sub>CO-}; MS [*m/z*]: 924.9304; Calcd. For C<sub>50</sub>H<sub>83</sub>O<sub>10</sub>Br: C, 64.94%, H, 9.06%; Found: C, 64.95%, H, 9.08%.

Methyl 6-*O*-(3-bromobenzoyl)-2,3,4-tri-*O*-myristoyl- $\beta$ -D-galactopyranoside (10): Yield %73.05; m.p. 118–119 °C (EtOAc-*n*-C<sub>6</sub>H<sub>14</sub>, *R<sub>f</sub>* = 0.55); IR (KBr):  $\nu$ /cm<sup>−1</sup> 1718 (C=O); <sup>1</sup>H-NMR (400 MHz, CDCl<sub>3</sub>) (ppm):  $\delta$ <sub>H</sub> 8.11 (1H, d, *J* = 7.3 Hz, Ar-H), 8.04 (1H, s, Ar-H), 7.96 (1H, d, *J* = 7.3 Hz, Ar-H), 7.86 (1H, t, *J* = 7.3 Hz, Ar -H), 5.69 (1H, d, *J* = 8.1 Hz, H-1), 5.53 (1H, dd, *J* = 8.1 and 10.2 Hz, H-2), 5.28 (1H, dd, *J* = 3.1 and 10.2 Hz, H-3), 4.97 (1H, d, *J* = 3.2 Hz, H-4), 4.29 (1H, dd, *J* = 11.1 and 6.8 Hz, H-6a), 3.83 (1H, dd, *J* = 11.0 and 6.3 Hz, H-6b), 3.62 (1H, m, H-5), 3.42 (3H, s, 1-OCH<sub>3</sub>), 2.24 {6H, m, 3×CH<sub>3</sub>(CH<sub>2</sub>)<sub>11</sub>CH<sub>2</sub>CO-}, 1.63 {6H, m, 3×CH<sub>3</sub>(CH<sub>2</sub>)<sub>10</sub>CH<sub>2</sub>CH<sub>2</sub>CO-}, 1.26 {60H, m, 3×CH<sub>3</sub>(CH<sub>2</sub>)<sub>10</sub>CH<sub>2</sub>CH<sub>2</sub>CO-}, 0.88 {9H, m, 3×CH<sub>3</sub>(CH<sub>2</sub>)<sub>12</sub>CO-}; MS [*m/z*]: 1009.0802; Calcd. For C<sub>56</sub>H<sub>95</sub>O<sub>10</sub>Br: C, 66.66%, H, 9.50%; Found: C, 66.68%, H, 9.52%.
